# Supplementary material for: Exploring correlation between alkaline phosphatase and venous thromboembolism in East Asian populations: a cohort and Mendelian randomization study
Source: Research Square preprint supplement (doi:10.21203/rs.3.rs-6431721/v1), 2025-05-07
Supplement: Supplementary file 1 [file c607fc71c88f84dc938d5c4c.docx]

Supplementary Table 3. Reverse MR.

| **exposure** | **outcome** | **MR method** | **No. SNP** | **b** | **se** | **or** | **95% CI** | **pval** |
| --- | --- | --- | --- | --- | --- | --- | --- | --- |
| VTE | ALP | Inverse variance weighted | 13 | -0.008 | 0.006 | 0.992 | -0.020-0.003 | 0.161 |
| VTE | ALP | MR Egger | 13 | -0.003 | 0.018 | 0.997 | -0.038-0.032 | 0.885 |
| VTE | ALP | Weighted median | 13 | -0.008 | 0.007 | 0.992 | -0.022-0.007 | 0.308 |
| VTE | ALP | Weighted mode | 13 | -0.015 | 0.010 | 0.985 | -0.034-0.004 | 0.153 |
